# Supplementary material for: Effectiveness of pneumococcal conjugate vaccine against presumed bacterial pneumonia hospitalisation in HIV-uninfected South African children: a case–control study
Source: HighWire-hosted journal article supplement (doi:10.1136/thoraxjnl-2014-206593), 2015-06-19
Supplement: thoraxjnl-2014-206593supp.pdf [file thoraxjnl-2014-206593supp.pdf]

**Supplementary Table 1A. Effectiveness of up-to-date pneumococcal conjugate vaccine schedule against presumed bacterial pneumonia in HIV-uninfected children born before March 1, 2011**

|              | Age group (weeks) | Cases with hospital controls<br>Cases=991, controls=1511 |                        |                                   | Cases with hospital controls, Soweto only<br>Cases=674, controls=1075 |                        |                       | Cases with community controls<br>Cases=672, controls=1968 |                      |                                   |
|--------------|-------------------|----------------------------------------------------------|------------------------|-----------------------------------|-----------------------------------------------------------------------|------------------------|-----------------------|-----------------------------------------------------------|----------------------|-----------------------------------|
|              |                   | Strata in model*                                         | Crude VE (95% CI)      | Adjusted <sup>†</sup> VE (95% CI) | Strata in model*                                                      | Crude VE (95% CI)      | Adjusted* VE (95% CI) | Strata in model*                                          | Crude VE (95% CI)    | Adjusted <sup>‡</sup> VE (95% CI) |
| By age group |                   |                                                          |                        |                                   |                                                                       |                        |                       |                                                           |                      |                                   |
|              | 8-15              | 58/129                                                   | -13.7<br>(-93.7, 33.3) | 16.7<br>(-94.7, 64.4)             | 38/80                                                                 | -6.8<br>(-106.5, 44.8) | 74.8<br>(-7.7, 94.1)  | 42/86                                                     | 9.6<br>(-72.8, 52.7) | -16.1<br>(-129.2, 41.2)           |
|              | 16-40             | 38/361                                                   | 33.2<br>(-13.3, 60.6)  | 35.8<br>(-23.4, 66.6)             | 14/223                                                                | 36.7<br>(-44.3, 72.3)  | 52.5<br>(-36.4, 83.4) | 32/221                                                    | 45.3<br>(-5.2, 71.6) | 49.1<br>(-0.2, 74.2)              |
|              | >=41              | 38/501                                                   | -4.1<br>(-68.3, 35.6)  | 15.5<br>(-50.3, 52.4)             | 31/371                                                                | -5.6<br>(-85.9, 40.0)  | 23.5<br>(-49.9, 61.0) | 24/365                                                    | 55.8<br>(18.1, 76.1) | 46.4<br>(-4.6, 72.5)              |
|              | 16-103            | 71/782                                                   | 28.2<br>(-3.6, 50.2)   | 38.9<br>(5.0, 60.8)               | 38/524                                                                | 31.1<br>(-13.5, 58.1)  | 51.4<br>(9.9, 73.8)   | 54/519                                                    | 53.4<br>(25.5, 70.9) | 50.4<br>(18.0, 70.1)              |
| Overall      | >=8               | 140/991                                                  | 9.6<br>(-20.5, 32.2)   | 22.2<br>(-11.1, 45.5)             | 84/674                                                                | 9.4<br>(-32.0, 37.7)   | 38.2<br>(0.5, 61.7)   | 99/672                                                    | 39.9<br>(13.2, 58.4) | 29.9<br>(-3.6, 52.5)              |

\*The denominator indicates the number of strata (case-control sets) in that sub-group, and the numerator indicates the number of strata contributing to the model. When using conditional logistic regression, only discordant strata (i.e. sets with vaccinated case and at least one non-vaccinated control or with non-vaccinated case and at least one vaccinated control) contribute to the model.

<sup>†</sup> Adjusted for race, sex, discharge diagnosis of malnutrition, low birth weight, exclusive breastfeeding up to the age of 4 months, prior hospitalization for pneumonia, daycare attendance, mother self-reported HIV-infected, maternal education level <11<sup>th</sup> grade, contact with an adult with tuberculosis, more than 2 people sleeping in room with child, flush toilet in the home, and receipt of ≥1 dose of diphtheria-tetanus pertussis vaccine

<sup>‡</sup> Adjusted for weight –for-age Z score <2

**Supplementary Table 1B. Effectiveness of up-to-date pneumococcal conjugate vaccine schedule against presumed bacterial pneumonia in HIV-uninfected children born on or after March 1, 2011**

|              | Age group (weeks) | Cases with hospital controls<br>Cases=335, controls=564 |                         | Cases with hospital controls, Soweto only<br>Cases=219, controls=378 |                  | Cases with community controls<br>Cases=217, controls=660 |                        |                  |                       |                                   |
|--------------|-------------------|---------------------------------------------------------|-------------------------|----------------------------------------------------------------------|------------------|----------------------------------------------------------|------------------------|------------------|-----------------------|-----------------------------------|
|              |                   | Strata in model*                                        | Crude VE (95% CI)       | Adjusted <sup>†</sup> VE (95% CI)                                    | Strata in model* | Crude VE (95% CI)                                        | Adjusted* VE (95% CI)  | Strata in model* | Crude VE (95% CI)     | Adjusted <sup>‡</sup> VE (95% CI) |
| By age group |                   |                                                         |                         |                                                                      |                  |                                                          |                        |                  |                       |                                   |
|              | 8-15              | 34/100                                                  | -89.7<br>(-306.1, 11.4) | 18.8<br>(-121.3., 70.2)                                              | 23/55            | -56.0<br>(-280.6, 36.1)                                  | 40.2<br>(-95.0, 81.7)  | 26/56            | 22.2<br>(-78.7, 66.2) | 18.6<br>(-119.4, 69.8)            |
|              | 16-40             | 6/177                                                   | 19.9<br>(-128.1, 71.9)  | 22.8<br>(-202.4, 80.3)                                               | 5/115            | 41.3<br>(-94.5, 82.3)                                    | 53.2<br>(-128.5, 90.)4 | 12/114           | 59.5<br>(-8.4, 84.9)  | 57.7<br>(-21.7, 85.3)             |
|              | >=41              | 1/58                                                    | 62.7<br>(-528.7, 97.8)  | 13.7<br>(-99.2, 62.6)                                                | 1/49             | --                                                       | 30.6<br>(-100.4, 75.9) | 1/47             | --                    | --                                |
|              | 16-103            | 8/235                                                   | 22.9<br>(-101.1, 70.5)  | 39.1<br>(-112.1, 82.5)                                               | 6/164            | 52.6<br>(-47.8, 84.8)                                    | 63.1<br>(-56.5, 91.3)  | 13/161           | 62.1<br>(3.6, 85.1)   | 61.3<br>(-5.6, 85.8)              |
| Overall      | >=8               | 44/335                                                  | -32.8<br>(-130.8, 23.6) | 13.1<br>(-79.5, 57.9)                                                | 30/219           | -0.1<br>(-92.6, 47.9)                                    | 42.1<br>(-34.9, 75.1)  | 39/217           | 42.8<br>(-6.7, 69.3)  | 42.4<br>(-15.6, 71.3)             |

\*The denominator indicates the number of strata (case-control sets) in that sub-group, and the numerator indicates the number of strata contributing to the model. When using conditional logistic regression, only discordant strata (i.e. sets with vaccinated case and at least one non-vaccinated control or with non-vaccinated case and at least one vaccinated control) contribute to the model.

<sup>†</sup> Adjusted for race, sex, discharge diagnosis of malnutrition, low birth weight, exclusive breastfeeding up to the age of 4 months, prior hospitalization for pneumonia, daycare attendance, mother self-reported HIV-infected, maternal education level <11<sup>th</sup> grade, contact with an adult with tuberculosis, more than 2 people sleeping in room with child, flush toilet in the home, and receipt of ≥1 dose of diphtheria-tetanus pertussis vaccine

<sup>‡</sup> Adjusted for weight –for-age Z score <2
